# Supplementary material
Source: MDPI journal article supplement (https://www.mdpi.com/1996-1073/15/13/4904)
Supplement: s1 [file s1]

# Supplementary material

**Table S1.** Studies conducted on firewood use in Mexico and their primary assumptions and source of information.

| Authors | Objective                                                                                                                                                                                                                                                         | Energy Consumption                                                                                                                                                                 | Population Data Utilized for Firewood Users                                                                                                                                                                                                                                | Regions or Population Centers where BCS Utilized                                                                                                                                                                       |
|---------|-------------------------------------------------------------------------------------------------------------------------------------------------------------------------------------------------------------------------------------------------------------------|------------------------------------------------------------------------------------------------------------------------------------------------------------------------------------|----------------------------------------------------------------------------------------------------------------------------------------------------------------------------------------------------------------------------------------------------------------------------|------------------------------------------------------------------------------------------------------------------------------------------------------------------------------------------------------------------------|
| [1]     | Identifying on a national scale the segments of the residential sector where firewood is utilized; the availability of the resource in the year 2000; and provision of an estimate of net CO <sub>2</sub> emissions resulting from non-renewable use of firewood. | Based on data from both case studies and academic studies reported in [2–4], a per capita range of 1.5 to 3.0 kg per day of firewood was obtained, depending on the climate region | Based on Mexican Census of Population and Housing (CPH) data for the years 1990–2000, an estimated number of exclusive users was obtained; and on the basis of local interviews reported in an academic study of reference [4], an estimate of mixed users was determined. | Using a 1995 geo-referenced map of Mexican municipalities, WISDOM methodology was employed (which utilized data from the National Forest Survey of 2000 and the INEGI vegetation map) to identify 2395 municipalities. |
| [5]     | Analysis and projection of type of firewood consumption in Mexico between 2010 and 2030 at the municipal level and examination of regional differences, with identification of areas of highest consumption.                                                      | Based on data adapted from [1], it was determined that per capita firewood consumption ranged from 1.5 to 3.0 kg/day, depending on climate region.                                 | No. of households utilizing firewood in 2010 was estimated on the basis of CPH data from 1990 and 2000. Projections for the year 2030 were obtained utilizing a BAU scenario, as well as the projection of population growth in the 2012 CONAPO.                           | Based on estimate of exclusive users and mixed users reported by [1], 2500 municipalities were identified.                                                                                                             |

Source: Own elaboration.

**Table S2.** Studies that have analyzed firewood use during a particular year and their primary assumptions and sources of information.

| Authors | Primary Assumptions for Calculated No. of Persons Using Firewood                                                                                                                                                                                                           | Reported Consumption of Firewood                                                                                                      | Geographical Breakdown                                          |
|---------|----------------------------------------------------------------------------------------------------------------------------------------------------------------------------------------------------------------------------------------------------------------------------|---------------------------------------------------------------------------------------------------------------------------------------|-----------------------------------------------------------------|
| [6]     | An estimated 6 million households utilized firewood in a traditional manner during the year 2003. An estimated one-fourth of the Mexican population cooks with firewood on three-stone fires. Estimated consumption using these inefficient devices during 2003 of 257 PJ. | Approximately 43 GJ per conventional device                                                                                           | National                                                        |
| [7]     | An estimated 25 million persons (one-fourth of Mexican households). Approximately 80% of Mexico's rural population depends on firewood for cooking and boiling water.                                                                                                      | Consumption of firewood using three-stone fires: 4.2 tDM per device per year. Firewood productivity: 2.9 tDM/ha/year                  | National                                                        |
| [8]     | In the reference year, there were 4.5 million users of three-stone fires. Initial renewability of firewood use is 80% (20% of users use non-renewable firewood).                                                                                                           |                                                                                                                                       | National                                                        |
| [9]     | In the residential sector, firewood used on three-stone fires. National consumption of firewood in residential sector 259.3 PJ, based on 2010 National Energy Balance [10].                                                                                                | Data from Masera et al. [11] case study, which reported specific consumption using traditional firewood stoves of 2.17 kg DM per day. | National                                                        |
| [12]    | Users consume firewood utilizing three-stone fires. Data reported by Serrano-Medrano et al. [5]. For the year 2010, no. of dwellings utilizing firewood was estimated on the basis of CPH data from 1990 and 2000.                                                         | Data reported in Reference [5]: per capita consumption of firewood ranged from 1.5 to 3.0 kg per day.                                 | Data reported in Reference [5], identified 2500 municipalities. |
| [13]    | It was estimated that, during the reference year, there were a total of 4.6 million three-stone fires in existence [9,14]. Estimated firewood consumption of 259 PJ in the residential sector.                                                                             | Data reported by García et al. [9] and by the National Commission for the Promotion of Housing (2006) [15]: average consumption of    | National                                                        |

firewood using  
inefficient stoves of  
56.9 GJ/year per stove.

Source: Own elaboration.

**Table S3.** Indicators used to determine socioeconomic stratification of dwellings, in accordance with INEGI classification based on the 2010 Census of Population and Housing Units.

| No. of indicator                             | Description                                                                                                                        |
|----------------------------------------------|------------------------------------------------------------------------------------------------------------------------------------|
| Proportion of population                     |                                                                                                                                    |
| 1                                            | With right to receive medical treatment in any public or private institution, except for public insurance (Seguro Popular).        |
| 2                                            | With right to receive healthcare services.                                                                                         |
| 3                                            | Between the ages of 3 and 14 and attending school.                                                                                 |
| 4                                            | Between the ages of 15 and 24 and attending school.                                                                                |
| 5                                            | Between the ages of 8 and 14, who know how to read and write.                                                                      |
| 6                                            | 15 years of age or older, who passed at least one school year other than pre-school.                                               |
| 7                                            | 15 years of age or older, who completed no grade higher than sixth grade of primary education.                                     |
| 8                                            | 15 years of age or older, who completed no higher than the third year of secondary education.                                      |
| 9                                            | Average number of years of schooling                                                                                               |
| 10                                           | 12 years or older who worked; who had a job but did not work; or who were seeking work during the reference week.                  |
| 11                                           | Girls and women aged 12 or older who worked; who had a job but did not work; or who were seeking work during the reference week.   |
| 12                                           | Occupancy rate                                                                                                                     |
| 13                                           | Unoccupied by persons between the ages of 12 and 17 who are included among the working population.                                 |
| 14                                           | Occupied by persons aged 18 and above who are included among the working population.                                               |
| Proportion of occupied private housing units |                                                                                                                                    |
| 15                                           | In which there is no crowding.                                                                                                     |
| 16                                           | That have a solid floor made of cement, tile, or other material.                                                                   |
| 17                                           | Having between 2 and 25 bedrooms.                                                                                                  |
| 18                                           | Having more than one room.                                                                                                         |
| 19                                           | Having between 3 and 25 rooms.                                                                                                     |
| 20                                           | With electrical lighting.                                                                                                          |
| 21                                           | With available running water within the housing unit, or outside the housing unit, but on their land.                              |
| 22                                           | That have a lavatory, toilet, latrine, or hole in the ground.                                                                      |
| 23                                           | With drainage connected to a public network, septic tank, ravine, crevice, river, lake, or sea.                                    |
| 24                                           | With drainage connected to a public network.                                                                                       |
| 25                                           | With a flushing toilet.                                                                                                            |
| 26                                           | With electrical lighting, running water inside the housing unit, or outside the housing unit but on the land, as well as drainage. |

|                                                 |                                                      |
|-------------------------------------------------|------------------------------------------------------|
| 27                                              | With no crowding on its street block.                |
| Proportion of private housing units possessing: |                                                      |
| 28                                              | Television                                           |
| 29                                              | Automobile or pickup truck                           |
| 30                                              | Cell phone                                           |
| 31                                              | Cell phone and landline phone                        |
| 32                                              | Radio, television, refrigerator, and washing machine |
| 33                                              | Radio and television                                 |
| 34                                              | All household goods                                  |

Source: INEGI [16].

## References

1. Ghilardi, A.; Guerrero, G.; Masera, O. Spatial Analysis of Residential Fuelwood Supply and Demand Patterns in Mexico Using the WISDOM Approach. *Biomass Bioenergy* **2007**, *31*, 475–491, doi:10.1016/j.biombioe.2007.02.003.
2. Díaz, R.; Masera, O.R. *Uso de La Leña En México: Situación Actual, Retos y Oportunidades*; Secretaría de Energía: Ciudad de México, México, 2003; p. 99–109.
3. Masera, O.R.; Díaz, R.; Berrueta, V. From Cookstoves to Cooking Systems: The Integrated Program on Sustainable Household Energy Use in Mexico. *Energy Sustain. Dev.* **2005**, *9*, 25–36, doi:10.1016/S0973-0826(08)60480-9.
4. Díaz Jiménez, R. *Consumo de Leña En El Sector Residencial de México: Evolución Histórica y Emisiones de CO<sub>2</sub>. Tesis de Maestría*, Universidad Nacional Autónoma de México: Ciudad de México, México, 2000.
5. Serrano-Medrano, M.; Arias-Chalico, T.; Ghilardi, A.; Masera, O. Spatial and Temporal Projection of Fuelwood and Charcoal Consumption in Mexico. *Energy Sustain. Dev.* **2014**, *19*, 39–46, doi:10.1016/j.esd.2013.11.007.
6. Islas, J.; Manzini, F.; Masera, O. A Prospective Study of Bioenergy Use in Mexico. *Energy* **2007**, *32*, 2306–2320, doi:10.1016/j.energy.2007.07.012.
7. Johnson, T.; Alatorre C.; Romo Z.; Feng, L. *México: Estudio Para La Disminución de Emisiones de Carbono (MEDEC)*; Banco Mundial en coedición con Mayol Ediciones S.A.: Ciudad de México, México, 2009.
8. Islas, J.; Manzini, F.; Macías, G.; Grande, G. *Hacia Un Sistema Energético Mexicano Bajo En Carbono. Desplegando El Potencial de Las Energías Renovables y Del Ahorro y Uso Eficiente de La Energía*; Primera Edición: Argentina, Misiones, 2015.
9. García, C.A.; Masera, O.; Riegelhaupt, E.; Ghilardi, A.; Skutsch, M.; Islas, J.; Manzini, F. Sustainable Bioenergy Options for Mexico: GHG Mitigation and Costs. *Renew. Sustain. Energy Rev.* **2015**, *43*, 545–552, doi.org/10.1016/j.rser.2014.11.062.
10. Secretaría de Energía (SENER). *Balance Nacional de Energía 2010*; Secretaría de Energía: Ciudad de México, México, 2011; p. 138.
11. Masera, O.; Arias, T.; Ghilardi, A.; Guerrero, G.; Patiño, P. Estudio Sobre La Evolución Nacional Del Consumo de Leña y Carbón Vegetal En México 1990–2024. In *Tercer Informe: Estimación de Los Consumos Nacionales de Leña y Carbón Vegetal Para El Periodo 2009–2024*; Universidad Nacional Autónoma de México: Ciudad de México, México, 2010; p. 45.
12. Serrano-Medrano, M.; García-Bustamante, C.; Berrueta, V.M.; Martínez-Bravo, R.; Ruiz-García, V.M.; Ghilardi, A.; Masera, O. Promoting LPG, Clean Woodburning Cookstoves or Both? Climate Change Mitigation Implications of Integrated Household Energy Transition Scenarios in Rural Mexico. *Environ. Res. Lett.* **2018**, *13*, 115004, doi:10.1088/1748-9326/aad5b8.
13. Grande-Acosta, G.K.; Islas-Samperio, J.M. Boosting Energy Efficiency and Solar Energy inside the Residential, Commercial, and Public Services Sectors in Mexico. *Energies* **2020**, *13*, 5601, doi:10.3390/en13215601.
14. Instituto Nacional de Estadística y Geografía (INEGI). Encuesta Nacional de Ingreso y Gasto En Los Hogares 2010. Available online: <https://www.inegi.org.mx/programas/enigh/tradicional/2010/> (accessed on 31 July 2020).
15. Comisión Nacional de Fomento a la Vivienda (CONAFOVI). *Guía Para El Uso Eficiente de La Energía En La Vivienda*; Comisión Nacional de Fomento a la Vivienda: Ciudad de México, México, 2006.

16. Instituto Nacional de Geografía y Estadística (INEGI). Encuesta Nacional de Ingresos y Gastos de Los Hogares (2018). Available online: <https://www.inegi.org.mx/programas/enigh/nc/2018/> (accessed on 20 April 2020)
